# Supplementary material
Source: MDPI journal article supplement (https://www.mdpi.com/2073-4352/12/10/1404)
Supplement: s1 [file s1]

# Supplementary Material

## Ferrocene formic acid surface modified Ni(OH)<sub>2</sub> for highly efficient alkaline oxygen evolution

Guo-Ping Shen<sup>1</sup>, Ruo-Yao Fan<sup>1</sup>, Bin Dong<sup>\*1</sup>, Bo Chen<sup>\*2</sup>

*1 State Key Laboratory of Heavy Oil Processing, College of Chemistry and Chemical Engineering, China University of Petroleum (East China), Qingdao 266580, China*

*2 Department of Chemistry, City University of Hong Kong, Kowloon, Hong Kong SAR, China*

---

\* Corresponding author. Email: [dongbin@upc.edu.cn](mailto:dongbin@upc.edu.cn) (B. Dong); [bchen005@e.ntu.edu.sg](mailto:bchen005@e.ntu.edu.sg) (B. Chen)

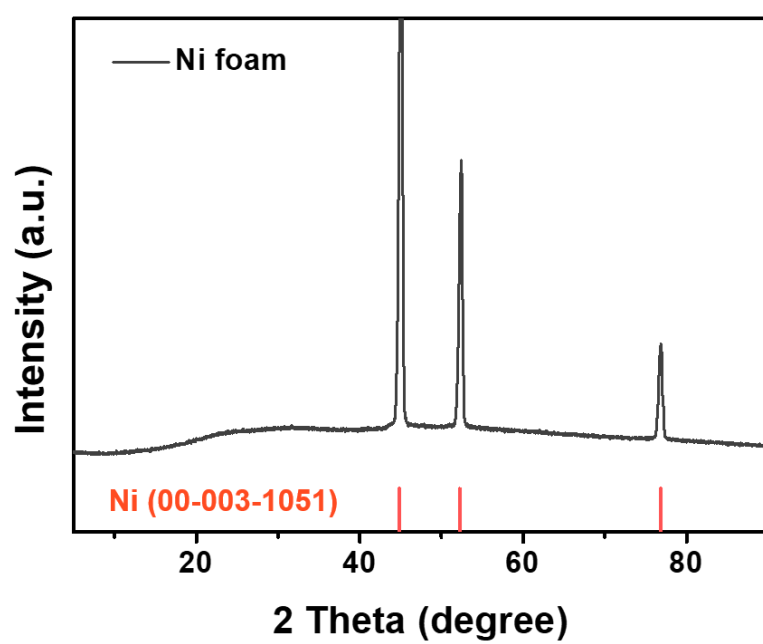

**Figure S1.** XRD of Ni foam.

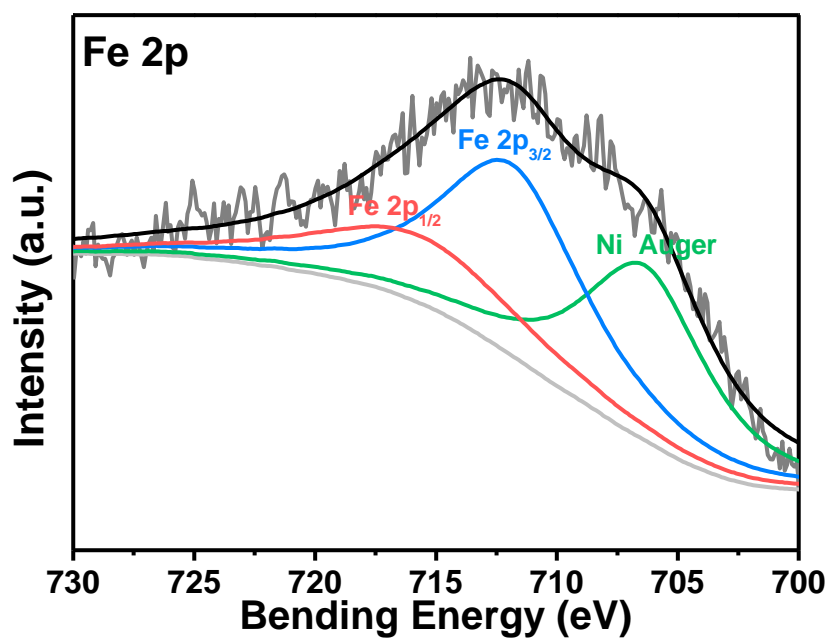

**Figure S2.** Fe 2p of FFA-Ni(OH)<sub>2</sub>/NF.

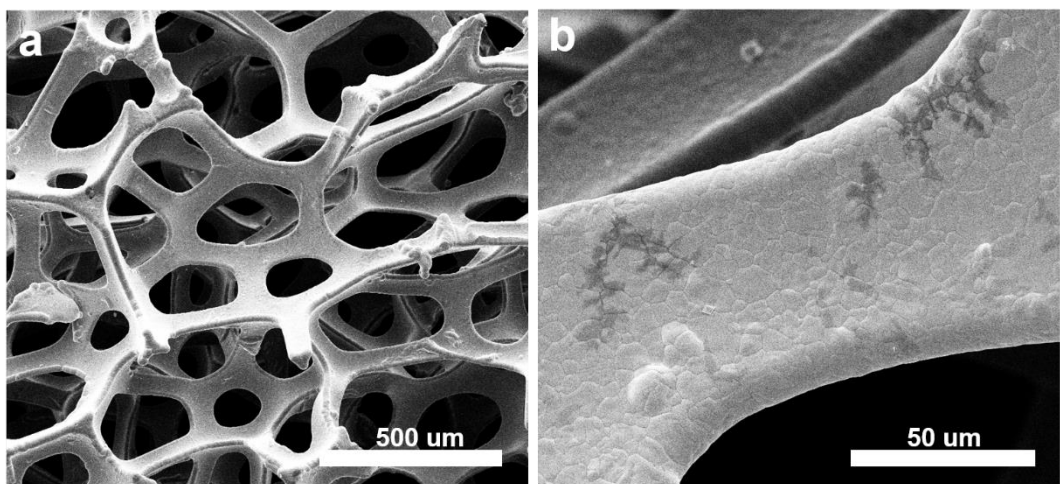

**Figure S3.** SEM images of NF.

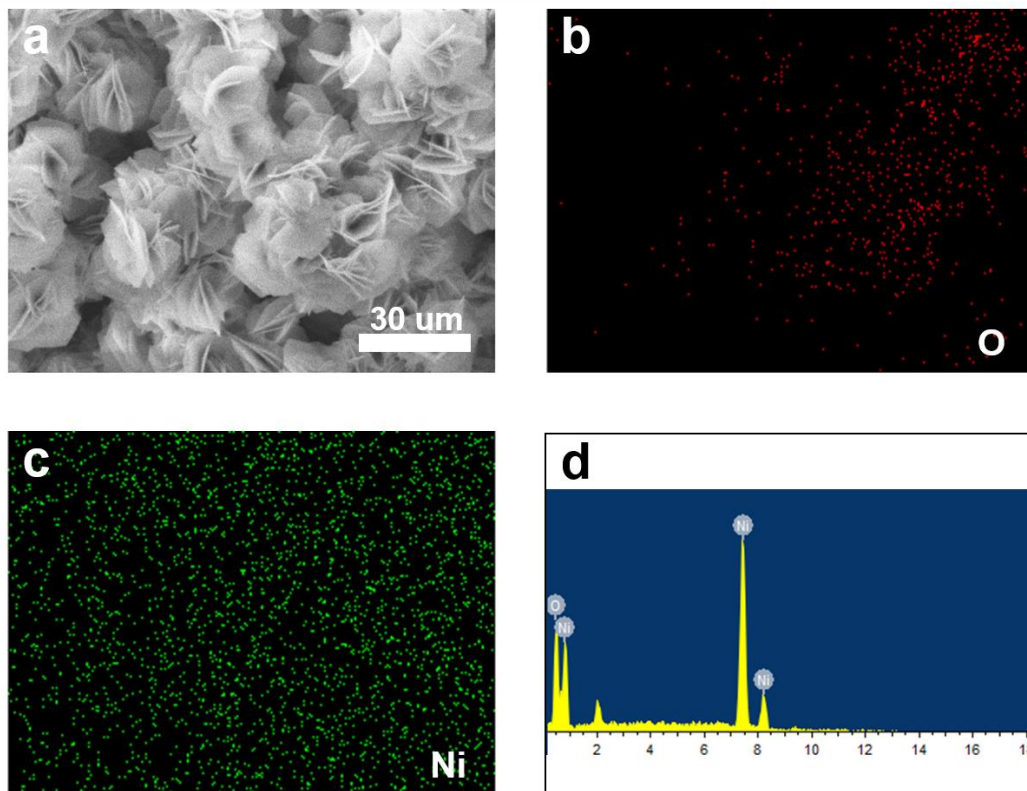

**Figure S4.** SEM-Mappings of  $\text{Ni(OH)}_2/\text{NF}$ .

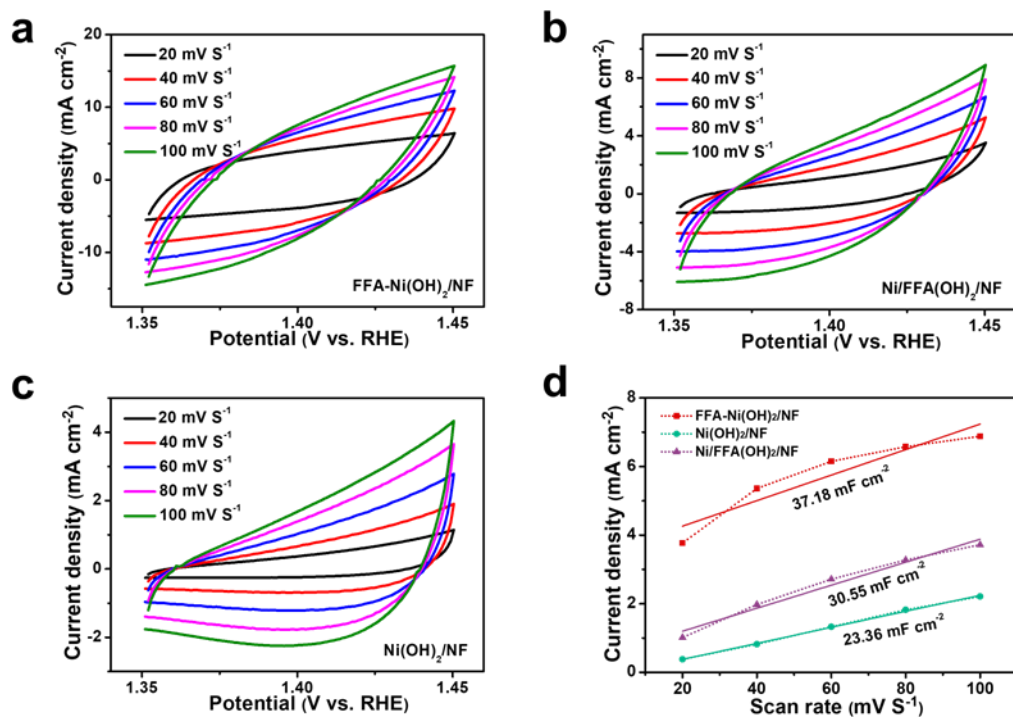

**Figure S5.** CVs of (a) FFA-Ni(OH)<sub>2</sub>/NF, (b) Ni/FFA(OH)<sub>2</sub>/NF, and (c) Ni(OH)<sub>2</sub>/NF (at 1.35-1.45 V vs, RHE). (d) C<sub>dl</sub> of FFA-Ni(OH)<sub>2</sub>/NF, Ni/FFA(OH)<sub>2</sub>/NF and Ni(OH)<sub>2</sub>/NF.

| Elements | Weight percentage % | Atomic percent % |
|----------|---------------------|------------------|
| O K      | 35.85               | 67.21            |
| Fe K     | 0.41                | 0.22             |
| Ni K     | 63.74               | 32.56            |
| Total    | 100                 | 100              |

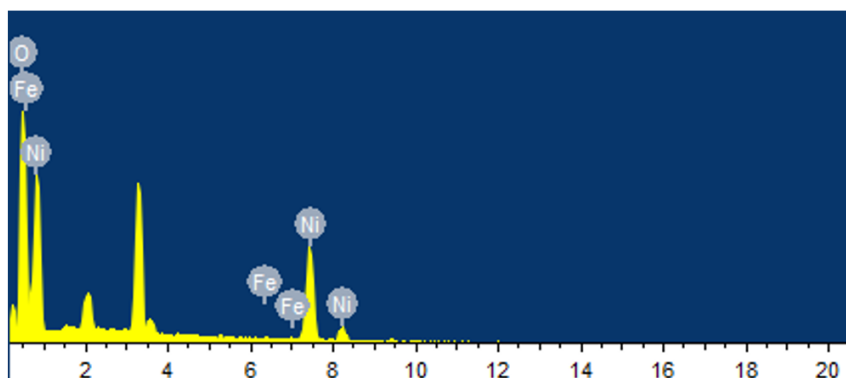

**Figure S6.** The surface element content statistics of FFA-Ni(OH)<sub>2</sub>/NF.

**Table S1.** Comparison of the overpotential between the catalyst in this work and the previously reported Fe-Ni based OER electrocatalysts.

| Ref.      | Electrocatalyst                                                      | Current density | Overpotential | Tafel slope |
|-----------|----------------------------------------------------------------------|-----------------|---------------|-------------|
| [37]      | r-FeOOH/a-Ni(OH) <sub>2</sub> /NF                                    | 100             | 310           | 51.4        |
| [38]      | Ni-Fe LDH NSA                                                        | 100             | 320           | 70          |
| [39]      | Ni-Fe-OH/Ni <sub>3</sub> S <sub>2</sub> /NF                          | 100             | 324           | 54          |
| [40]      | (Ni,Fe)S <sub>2</sub> @MoS <sub>2</sub>                              | 100             | 330           | 43.21       |
| [41]      | FeNC-550                                                             | 10              | 340           | 86.67       |
| [42]      | Ru/NiFe LDH-F/NF                                                     | 100             | 345           | 50.2        |
| [43]      | Ni-Fe@rGO                                                            | 10              | 350           | 38          |
| [44]      | (FeNi)O/NiSe@NF                                                      | 100             | 370           | 70.6        |
| [45]      | Ni-Fe samples                                                        | 100             | 374           | 86          |
| [46]      | Ni <sub>3</sub> S <sub>2</sub> @FeNi <sub>2</sub> S <sub>4</sub> @NF | 100             | 379           | 92          |
| [47]      | Fe-Co-Ni-S <sub>x</sub> /NF                                          | 100             | 390           | 86          |
| This work | FFA-Ni(OH) <sub>2</sub> /NF                                          | 100             | 311           | 77.68       |
